# Supplementary material for: Long-lasting cellular immunity to SARS-CoV-2 following infection or vaccination and implications for booster strategies
Source: bioRxiv or medRxiv preprint supplement (doi:10.1101/2021.12.29.21268469), 2021-12-31
Supplement: Supplementary file [file media-1.pdf]

**Supplementary Table S1.** Basic demographic and clinical data of 30 healthcare workers who received BNT162b2 mRNA COVID-19 vaccine and were followed up to 8 months.

|                                       | <b>Subject ID</b> | <b>Gender</b> | <b>COVID-19 severity</b> |
|---------------------------------------|-------------------|---------------|--------------------------|
| <b>COVID-19 recovered individuals</b> | R1                | male          | mild                     |
|                                       | R2                | female        | mild                     |
|                                       | R3                | female        | severe                   |
|                                       | R4                | female        | mild                     |
|                                       | R5                | male          | moderate                 |
|                                       | R6                | male          | mild                     |
|                                       | R7                | female        | mild                     |
|                                       | R8                | male          | moderate                 |
|                                       | R9                | female        | mild                     |
|                                       | R10               | female        | mild                     |
|                                       | R11               | male          | mild                     |
|                                       | R12               | male          | critical                 |
|                                       | R13               | male          | critical                 |
|                                       | R14               | female        | mild                     |
|                                       | R15               | female        | mild                     |
| Mean±SD                               | -                 | -             | -                        |
| <b>Naïve individuals</b>              | N1                | male          | na                       |
|                                       | N2                | female        | na                       |
|                                       | N3                | male          | na                       |
|                                       | N4                | female        | na                       |
|                                       | N5                | female        | na                       |
|                                       | N6                | female        | na                       |
|                                       | N7                | male          | na                       |
|                                       | N8                | female        | na                       |
|                                       | N9                | male          | na                       |
|                                       | N10               | male          | na                       |
|                                       | N11               | male          | na                       |
|                                       | N12               | female        | na                       |
|                                       | N13               | female        | na                       |
|                                       | N14               | female        | na                       |
|                                       | N15               | male          | na                       |
| Mean±SD                               | -                 | -             | -                        |

*na denotes not applicable*

**Supplementary Table S2.** Basic demographic and clinical data of 125 healthcare workers who received BNT162b2 mRNA COVID-19 vaccine and were followed up to 6 months.

|                                                                              | <b>COVID-19 recovered individuals</b> | <b>Naïve individuals</b> |
|------------------------------------------------------------------------------|---------------------------------------|--------------------------|
| <b>No. subjects</b>                                                          | 39                                    | 86                       |
| <b>Age (years)</b><br>Mean±SD                                                | 50.4±11.3                             | 45.5±14.3                |
| <b>Gender</b>                                                                |                                       |                          |
| - Male, n (%)                                                                | 12 (31.6)                             | 39 (45.3)                |
| - Female, n (%)                                                              | 26 (68.4)                             | 47 (54.6)                |
| <b>COVID-19 severity</b>                                                     |                                       | Na                       |
| - Asymptomatic/mild, n (%)                                                   | 31 (79.5)                             |                          |
| - Moderate, n (%)                                                            | 2 (5.1)                               |                          |
| - Severe, n (%)                                                              | 2 (5.1)                               |                          |
| - Critical, n (%)                                                            | 4 (10.3)                              |                          |
| <b>Time from COVID-19 diagnosis<sup>o</sup> to first vaccine dose (days)</b> |                                       | na                       |
| - Mean±SD                                                                    | 230.4±93.6                            |                          |

*na* denotes *not applicable*

**Supplementary Table S3.** Basic demographic and clinical data of 14 healthcare workers who received booster BNT162b2 mRNA COVID-19 vaccine injection and were followed up to one week.

|                                                              | <b>Subject ID</b> | <b>Gender</b> | <b>COVID-19 severity</b> |
|--------------------------------------------------------------|-------------------|---------------|--------------------------|
| <b>COVID-19 recovered individuals receiving booster dose</b> | RB1               | female        | severe                   |
|                                                              | RB2               | female        | mild                     |
|                                                              | RB3               | male          | critical                 |
|                                                              | RB4               | male          | moderate                 |
|                                                              | RB5               | female        | mild                     |
|                                                              | RB6               | male          | critical                 |
|                                                              | RB7               | female        | mild                     |
| Mean±SD                                                      | -                 | -             | -                        |
| <b>Naïve individuals receiving booster dose</b>              | NB1               | female        | na                       |
|                                                              | NB2               | female        | na                       |
|                                                              | NB3               | male          | na                       |
|                                                              | NB4               | female        | na                       |
|                                                              | NB5               | male          | na                       |
|                                                              | NB6               | male          | na                       |
|                                                              | NB7               | male          | na                       |
| Mean±SD                                                      | -                 | -             | -                        |

*na denotes not applicable*

**Supplementary Table S4.** Basic demographic and clinical data of 14 individuals who were hospitalized for COVID-19 between March and April 2020 and followed up to 12 months from discharge.

|                                                    | <b>Subject ID</b> | <b>Gender</b> | <b>COVID-19 severity</b> |
|----------------------------------------------------|-------------------|---------------|--------------------------|
| <b>Unvaccinated COVID-19 recovered individuals</b> | U1                | male          | moderate                 |
|                                                    | U2                | male          | moderate                 |
|                                                    | U3                | male          | severe                   |
|                                                    | U4                | female        | severe                   |
|                                                    | U5                | male          | moderate                 |
|                                                    | U6                | male          | severe                   |
|                                                    | U7                | male          | critical                 |
|                                                    | U8                | male          | critical                 |
|                                                    | U9                | female        | severe                   |
|                                                    | U10               | female        | critical                 |
|                                                    | U11               | female        | moderate                 |
|                                                    | U12               | female        | moderate                 |
|                                                    | U13               | female        | moderate                 |
|                                                    | U14               | male          | critical                 |
| Mean±SD                                            | -                 | -             | -                        |

**Supplementary Table S5. List of all fluorochrome mAbs used for flow cytometric analysis of antigen specific T cells.**

| <b>Antigen</b> | <b>Flurochrome</b>          | <b>Clone</b> | <b>Company</b> |
|----------------|-----------------------------|--------------|----------------|
| TNF- $\alpha$  | FITC                        | 6401.1111    | BDBioscience   |
| CD154          | PE                          | TRAP1        | BDBioscience   |
| CD3            | PerCP                       | SK7          | BDBioscience   |
| CD4            | PE-Cy7                      | SK3          | Invitrogen     |
| CD8            | Super Bright 600            | SK1          | eBioscience™   |
| IL-2           | APC                         | MQ1-17H12    | BDBioscience   |
| IFN- $\gamma$  | Pacific Blue                | B27          | BioLegend      |
| L/D            | Fixable Viability Stain 780 |              | BDBioscience   |

**Supplementary Table S6. List of all fluoro-chrome mAbs used for flow cytometric analysis of antigen specific B cells.**

| <b>Antigen</b> | <b>Fluoro-chrome</b> | <b>Clone</b> | <b>Company</b> |
|----------------|----------------------|--------------|----------------|
| CD19           | APC-Vio770           | LT19         | Miltenyi       |
| CD27           | VioBright FITC       | M-T271       | Miltenyi       |
| IgA            | VioGreen             | IS11-8E10    | Miltenyi       |
| IgG            | VioBlue              | IS11-3B2.2.3 | Miltenyi       |
| CD14           | PerCP                | TÜK4         | Miltenyi       |
| IgM            | APC                  | PJ2-22H3     | Miltenyi       |
| CD3            | PerCP                | BW264/56     | Miltenyi       |
| 7AAD           |                      |              | Miltenyi       |
| Spike          | PE                   |              | Miltenyi       |
| Spike          | PE-Vio770            |              | Miltenyi       |
